# Supplementary material
Source: Springer Nature journal article supplement (https://www.springermedizin.de/resource/supplementary/12930_2009_15_MOESM1_ESM.pdf/9424706)
Supplement: MOESM1 [file 9424706]

## **First step: Pilot interviews**

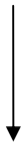

- Carrying out five interviews
- Consolidating the content of interview guides and the length of interviews

## **Second step: Following semi-structured interviews**

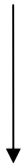

- Planning for approximately twenty interviews to attain theoretical saturation, where no new themes emerge
- Several further interviews undertaken to confirm whether saturation occurred

## **Completion of interviews**

Throughout these steps, researchers collected and analyzed the data concurrently.  
(= Constant comparison [18])
